# Supplementary material for: Combination of organic cation and cyclic sulfonylamide anion exhibiting plastic crystalline behavior in a wide temperature range
Source: Royal Society of Chemistry journal article supplement (doi:10.1039/c2ra20945d), 2012-01-01
Supplement: c2ra20945d.pdf [file c2ra20945d.pdf]

Supplementary information

## **Combination of organic cation and cyclic sulfonamide anion exhibiting plastic crystalline behavior in a wide temperature range**

**Makoto Moriya<sup>\*a,b</sup>, Takaaki Watanabe<sup>a</sup>, Wataru Sakamoto<sup>a</sup>, and Toshinobu Yogo<sup>\*a</sup>**

<sup>a</sup> *Division of Nanomaterial Science, EcoTopia Science Institute, Nagoya University, 464-8603, Furo-cho, Chikusa-ku, Nagoya, Japan. Fax: 81 52 789 2121; Tel: 81 52 789 2750;*

*E-mail: moriya@esi.nagoya-u.ac.jp, yogo@esi.nagoya-u.ac.jp*

<sup>b</sup> *Japan Science and Technology Agency, PRESTO, 4-1-8 Honcho Kawaguchi, Saitama, Japan. 332-0012*

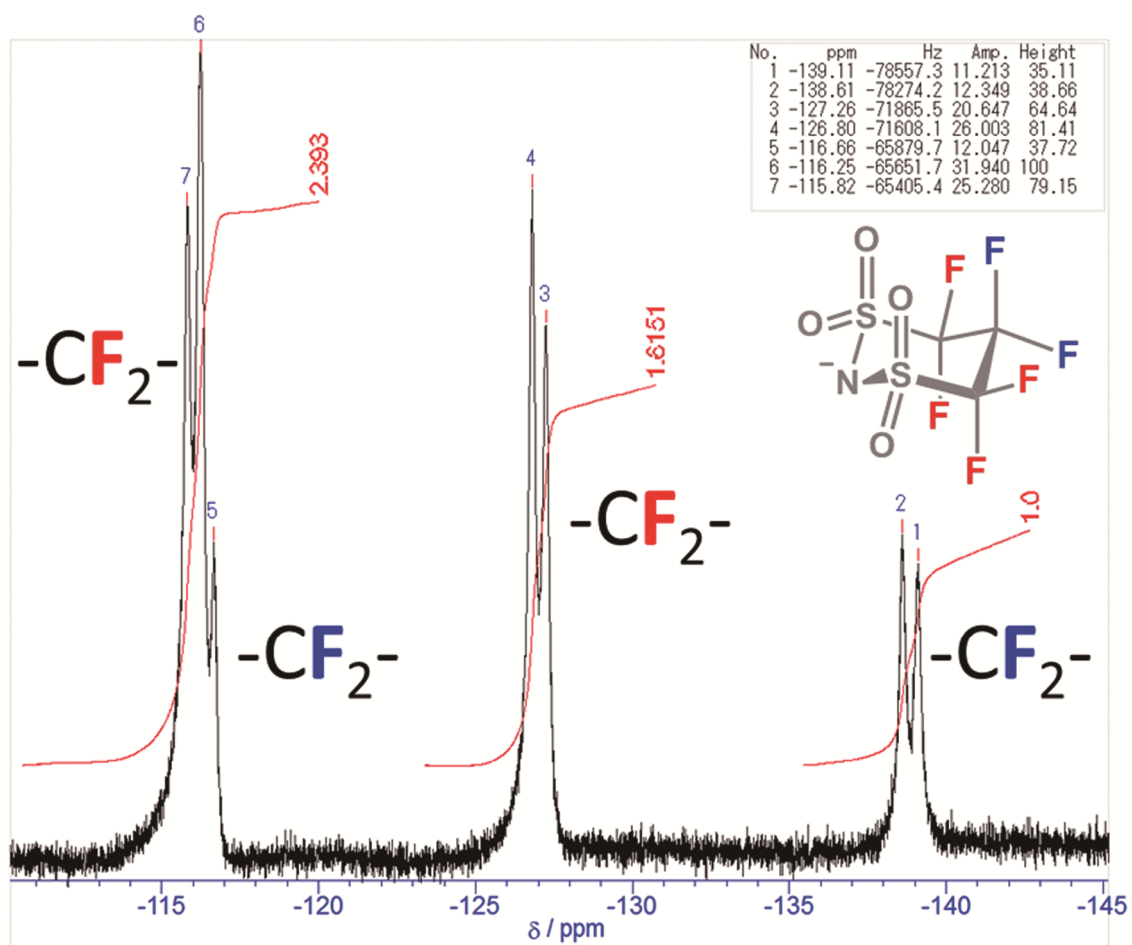

Figure S1.  $^{19}\text{F}$  NMR spectrum of  $[\text{N}_{1111}][\text{CPFSA}]$  in  $\text{CD}_3\text{OD}$  at  $-80^\circ\text{C}$ .

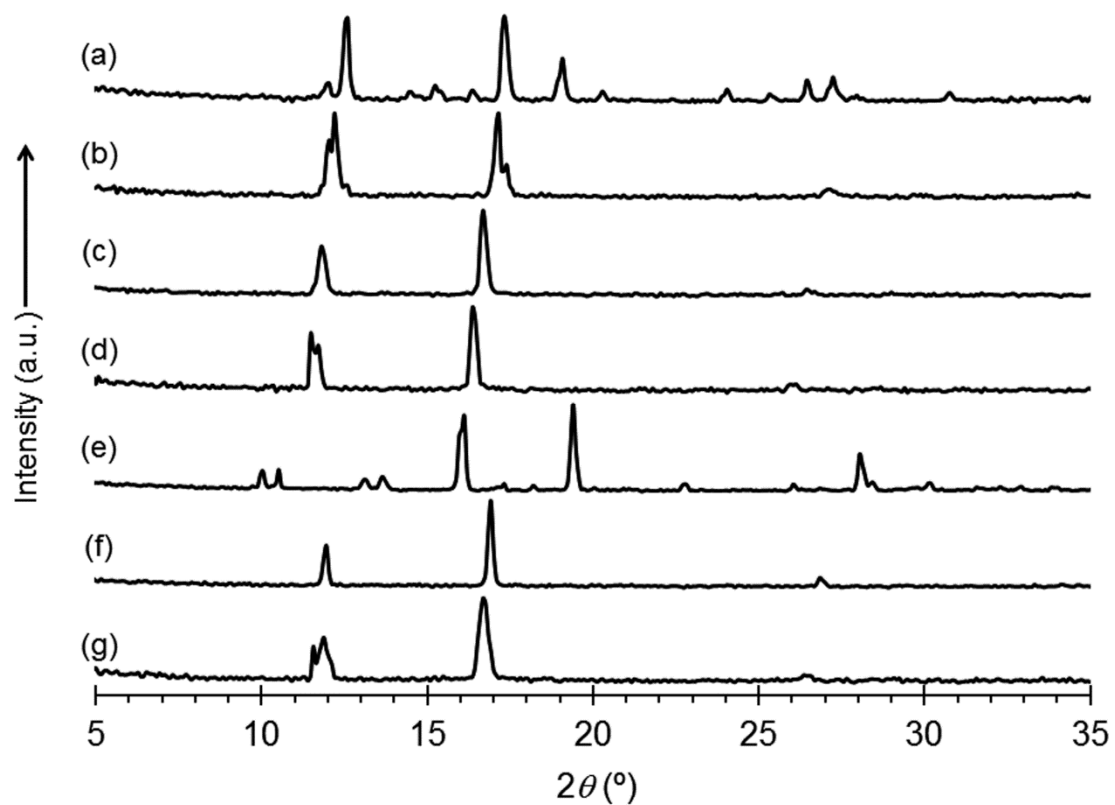

Figure S2. XRD patterns of the obtained compounds measured at room temperature. (a) [N<sub>1111</sub>][CPFSA], (b) [N<sub>1112</sub>][CPFSA], (c) [N<sub>1122</sub>][CPFSA], (d) [N<sub>1222</sub>][CPFSA], (e) [N<sub>2222</sub>][CPFSA], (f) [Py<sub>r11</sub>][CPFSA], (g) [Py<sub>r12</sub>][CPFSA].

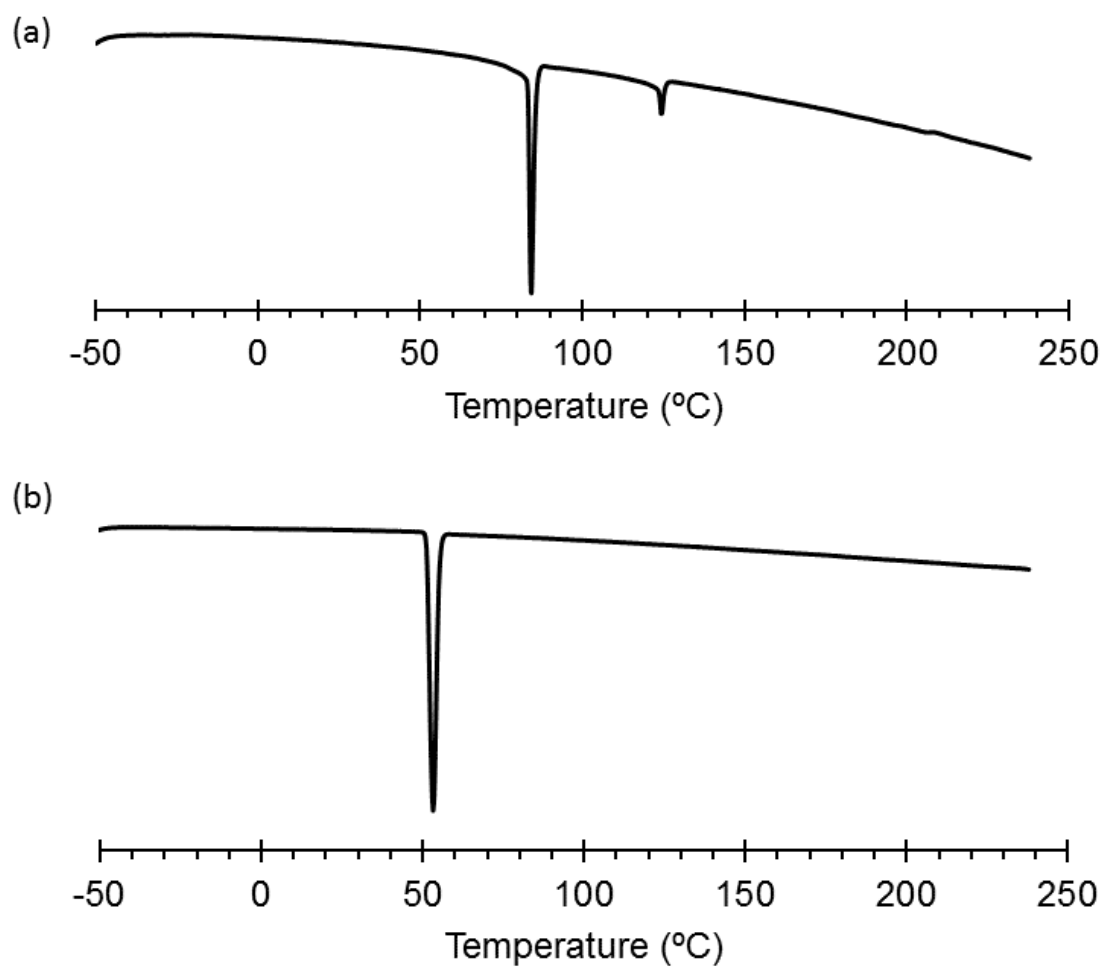

Figure S3. DSC curves of the obtained OIPCs. (a)  $[N_{1111}][CPFSA]$ , (b)  $[N_{2222}][CPFSA]$ .

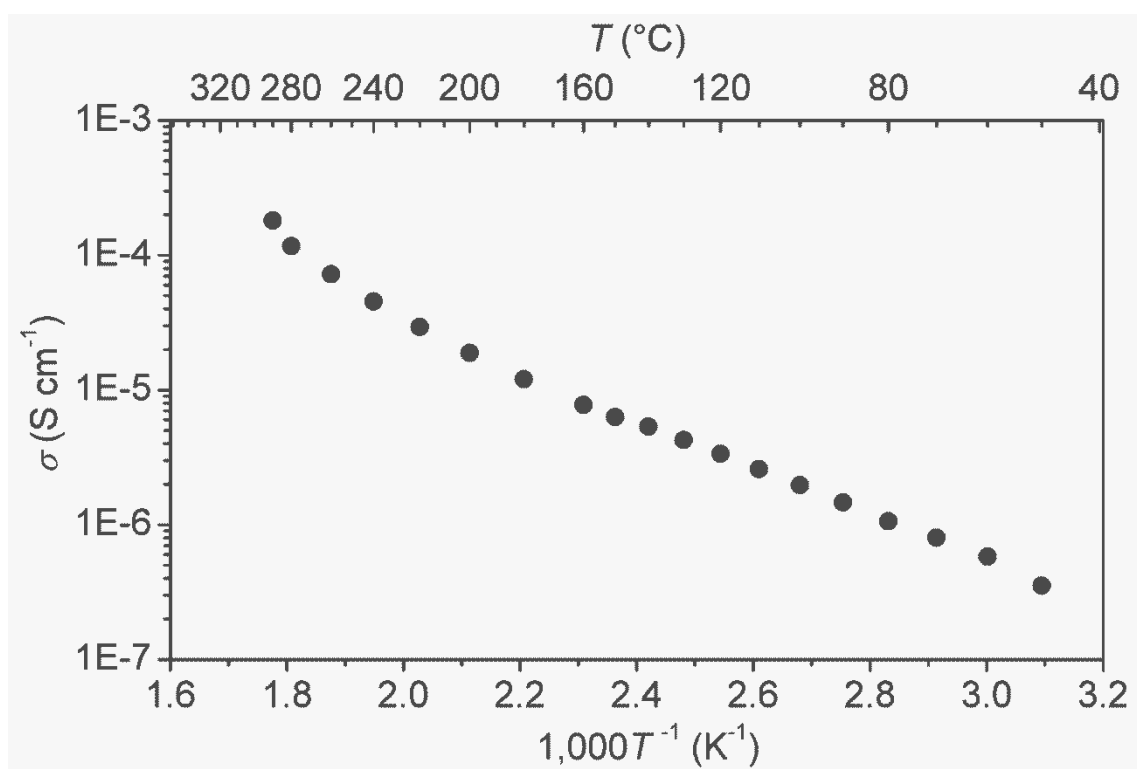

Figure S4. Solid state ionic conductivities of [N<sub>1122</sub>][CPFSA] (solid circle) as a function of temperature from 50 to 290 °C.
